# Supplementary material for: Does the GPM mission improve the systematic error component in satellite rainfall estimates over TRMM, an evaluation at a pan-India scale?
Source: Copernicus journal article supplement (doi:10.5194/hess-2016-221), 2016-06-27
Supplement: Supplementary file 1 [file 1.Catchment_information.xlsx]

## Sheet: Basin Names
Id	Basin Name	Elevation above M.S.L. (m)	Annual average precipitation (mm)
1	Above_Ramganga_Confluence_Sub_Basin	1816.87	1129.12
2	Area_of_Inland_Drainage_in_Rajasthan	229.09	322.47
3	Area_of_North_Ladakh_not_Draining_into_Indus_Basin	5299.54	786.54
4	Area_of_North_Ladakh_not_Draining_into_Indus_Basin	5170.6	1010.31
5	Bahmani_Sub_Basin	358.29	1424.08
6	Baitarni_Sub_Basin	307.78	1554.92
7	Banas_Sub_Basin	413.1	574.26
8	Barak and other_Sub_Basins	687.76	2438.14
9	Beas_Sub_Basin	1511.47	1270.92
10	Bhadar_and_other_WFR_Sub_Basin	93.39	712.29
11	Bhagirathi_and_other_Sub_Basins	63.24	1678.47
12	Bhatsol_and_others_Sub_Basin	170.37	2198.59
13	Bhima_Lower_Sub_Basin	492.29	712.47
14	Bhima_Upper_Sub_Basin	601.2	900.25
15	Brahmaputra_Lower_Sub_Basin	814.08	2458.73
16	Brahmaputra_Upper_Sub_Basin	1414.31	2355.37
17	Cauvery_Lower_Sub_Basin	93.67	956.46
18	Cauvery_Middle_Sub_Basin	644.45	888.71
19	Cauvery_Upper_Sub_Basin	913.23	1300.43
20	Chambal_Lower_Sub_Basin	294.1	756.47
21	Chambal_Upper_Sub_Basin	480.36	840.41
22	Chenab_Sub_Basin	2836.03	1247.04
23	Damodar_Sub_Basin	201.53	1437.98
24	Drainage_of_Rann_Sub_Basin	55.2	505.26
25	EFR_btw_Godavari_and_Krishna	64.51	1135.85
26	EFR_btw_Krishna_and_Pennar	132.7	927.98
27	Ghaghar_and_other_Sub_Basin	240.39	559.63
28	Ghaghara_Confluence_to_Gomti_Confluence	110.44	947.65
29	Ghaghara_Sub_Basin	551.35	1257
30	Ghandak_and_other_Sub_Basin	116.11	1201.19
31	Gilgit_Sub_Basin	4257.69	802.08
32	Godavari_Lower_Sub_Basin	347.34	1356.13
33	Godavari_Middle_Sub_Basin	483.62	861.7
34	Godavari_Upper_Sub_Basin	603.04	825.78
35	Gomti_Sub_Basin	120.97	935.73
36	Indravati_Sub_basin	502.23	1431.07
37	Indus_Lower	3872.69	1005.22
38	Indus_Upper	4640.88	953.32
39	Jhelum_Sub_Basin	2376.07	1095.5
40	Kali_Sindh_and_others_upto_Confluence_with_Parbati_Sub_Basin	379.43	858.43
41	Kosi_Sub_Basin	54.44	1336.92
42	Krishna_Lower_Sub_Basin	233.91	912.65
43	Krishna_Middle_Sub_Basin	433.2	724.05
44	Krishna_Upper_Sub_Basin	626.12	972.02
45	Luni_Lower_Sub_Basin	32.64	437.66
46	Luni_Upper_Sub_Basin	229.28	377.69
47	Mahanadi_Lower_Sub_Basin	248.19	1437.04
48	Mahanadi_Middle_Sub_Basin	389.48	1295.86
49	Mahanadi_Upper_Sub_Basin	348.66	1167.33
50	Mahi_Lower_Sub_Basin	95.34	860.36
51	Mahi_Upper_Sub_Basin	347.56	799.39
52	Manjra_Sub_Basin	565.93	864.65
53	Nagvati_and_other_Sub_Basins	282.46	1220.25
54	Narmada_Lower_Sub_Basin	140.61	957.96
55	Narmada_Middle_Sub_Basin	346.7	903.67
56	Narmada_Upper_Sub_Basin	526.76	1178.61
57	Netravati_and_other_Sub_Basins	269.06	3053.04
58	Palar_and_other_Sub_Basins	272.03	1012.1
59	Pamba_and_other_Sub_Basins	208.73	912.12
60	Pennar_Lower_Sub_Basin	314.78	910.43
61	Pennar_Upper_Sub_Basin	461.22	658.95
62	Periyar_and_other_Sub_Basins	351.71	1925.35
63	Ponnaiyar_and_other_Sub_Basins	351.94	908.37
64	Pranhita_and_other_Sub_Basins	301.14	1135.84
65	Ramganga_Sub_Basin	438.77	1070.12
66	Ravi_Sub_Basin	1476.84	1268.71
67	Sabarmati_Lower_Sub_Basin	69.52	672.25
68	Sabarmati_Upper_Sub_Basin	207.22	748.01
69	Saraswati_Sub_Basin	109.92	588.81
70	Sutlaj_Lower	241.58	612.07
71	Sutlaj_Upper	3891.54	989.62
72	Setrunji_and_other_EFR_Sub_Basins	89.4	648.65
73	Shyok_Sub_Basin	5084.84	833.47
74	Sone_Sub_Basin	463.26	1117.64
75	Subarnarekha_Sub_Basin	238.66	1471.18
76	Tapi_Lower_Sub_Basin	60.47	1168.03
77	Tapi_Middle_Sub_Basin	360.89	774.63
78	Tapi_Upper_Sub_Basin	414.07	884.33
79	Tons_Sub_Basin	285.64	984.23
80	Tungabhadra_Lower_Sub_Basin	550.46	599.46
81	Tungabhadra_Upper_Sub_Basin	641.18	1207.3
82	Upstream_of_Gomti_Confluence_to_Mujaffarnagar_Sub_basin	143.41	791.19
83	Vaippar_and_other_Sub_Basins	140.14	807.71
84	Vamsadhara_and_other_Sub_Basin	296.1	1321.36
85	Varrar_and_other_Sub_Basins	254.23	1836.61
86	Vasishti_and_other_Sub_Basins	285.78	2728.13
87	Wardha_Sub_Basin	358.6	1001.58
88	Weinganga_Sub_Basin	403.38	1227.65
89	Yamuna_Lower_Sub_Basin	291.32	884.98
90	Yamuna_Middle_Sub_Basin	230.91	603.24
91	Yamuna_Upper_Sub_Basin	830.69	854.84

## Sheet: README
Basin names are adapted from the Watershed Atlas of India (http://india-wris.nrsc.gov.in/Publications/WatershedSubbasinAtlas/Watershed%20Atlas%20of%20India.pdf). The red markings show that those catchments have been excluded from the analysis, mainly due to poor data quality. For calculating mean areal precipitation, gridded IMD precipitation data (0.25 x 0.25 degree) was used from 1980-2010. Mea…
