# Supplementary material for: Does the GPM mission improve the systematic error component in satellite rainfall estimates over TRMM, an evaluation at a pan-India scale?
Source: Copernicus journal article supplement (doi:10.5194/hess-2016-221), 2016-06-27
Supplement: Supplementary file 2 [file 2.R_Pbias_TRMM_IMERG_2014.xlsx]

## Sheet: Overall_corr_Pbias
Catchment ID	R (IMERG RESEARCH PRODUCT)	R (TRMM)	Pbias (IMERG RESEARCH PRODUCT)	P (TRMM)
1	0.907542	0.886516	2.73967	-0.0137421
2	0.864965	0.883329	-17.4875	-23.2762
3	0.567355	0.57588	-240.821	-237.36
4	0.257313	0.436324	-8.1755	-1.60633
5	0.899824	0.908914	-3.98189	-9.20889
6	0.89587	0.888682	1.46634	-7.90742
7	0.909663	0.879919	-1.88358	-1.6538
8	0.744036	0.797993	27.3085	-9.66104
9	0.711041	0.690027	-7.06727	-2.50666
10	0.889187	0.824166	22.1314	-5.34473
11	0.861154	0.845733	24.0257	6.83401
12	0.81828	0.811086	13.7351	14.4681
13	0.856975	0.814764	-18.2663	-4.19957
14	0.816807	0.837064	-29.6934	-26.773
15	0.820912	0.856578	33.6574	-9.1993
16	0.790639	0.755569	21.9592	-2.40527
17	0.833383	0.755657	-11.899	-6.16615
18	0.885251	0.82824	-10.9927	-20.6936
19	0.821875	0.768684	-21.9203	-27.0053
20	0.845127	0.799283	-4.46176	-12.6456
21	0.899923	0.871228	-5.99989	-9.44929
22	0.909325	0.89261	8.84892	23.1426
23	0.863941	0.83068	2.71937	-4.43199
24	0.742782	0.800756	53.1479	-22.9426
25	0.853083	0.854184	0.708198	-1.75462
26	0.896142	0.834165	-4.01415	-4.03574
27	0.826774	0.805358	-15.0214	-15.0787
28	0.853557	0.838455	-43.5398	-41.4617
29	0.82139	0.855389	-26.2426	-21.2218
30	0.918904	0.89729	-6.98425	-2.12041
31	0.369667	0.21021	37.289	53.7946
32	0.915402	0.8977	-2.1259	-2.54923
33	0.827908	0.784113	-75.2052	-55.8251
34	0.718873	0.648869	-58.3076	-55.4201
35	0.815106	0.833722	-30.4645	-33.6236
36	0.935292	0.911761	-5.75433	-5.38522
37	0.696232	0.632738	36.8148	48.7485
38	0.576255	0.666945	16.1314	28.8434
39	0.919381	0.86371	1.84925	13.4579
40	0.912983	0.895763	1.06481	-2.09779
41	0.841135	0.815834	5.5684	6.34565
42	0.898919	0.890893	11.3279	5.09002
43	0.828971	0.76929	-8.80905	4.64634
44	0.838151	0.800792	-0.358681	-10.8151
45	0.838727	0.833994	10.3314	-30.3269
46	0.900599	0.908422	-15.8673	-10.394
47	0.917621	0.907074	-1.96256	-5.05772
48	0.888237	0.910264	-1.57537	-1.80197
49	0.899245	0.891486	-13.7286	-5.09729
50	0.870667	0.81054	-0.536691	-19.6782
51	0.869591	0.835256	-20.1173	-14.3739
52	0.860815	0.863847	-43.3651	-33.5632
53	0.873641	0.904926	-17.8129	-19.1082
54	0.858292	0.820217	4.56132	-10.4727
55	0.910821	0.89714	-0.00115509	-9.3424
56	0.840505	0.845314	-7.64214	-5.85039
57	0.847776	0.81493	4.87779	10.9226
58	0.833573	0.713885	-16.3282	-15.8655
59	0.840087	0.747247	-16.1448	-20.4094
60	0.789162	0.694382	-3.60473	-14.3783
61	0.893966	0.87694	-17.6281	-17.4135
62	0.793777	0.756267	4.25132	10.2173
63	0.828808	0.816432	-24.5344	-16.9506
64	0.949868	0.938779	-3.72256	-4.79535
65	0.936556	0.851351	-23.7316	-18.2259
66	0.797563	0.827166	-22.0519	-12.6699
67	0.879236	0.923762	43.6378	-5.81108
68	0.910349	0.871835	7.35095	-9.31002
69	0.882555	0.899315	33.2167	-4.72134
70	0.83209	0.817923	-25.6206	-31.5634
71	0.697679	0.631276	24.52	12.1574
72	0.890861	0.856496	8.46732	-28.6655
73	0.393093	0.812145	-731.615	-383.316
74	0.864906	0.873706	-0.689912	-0.931217
75	0.839366	0.843983	3.43308	-5.46615
76	0.888962	0.836021	13.4012	-4.47931
77	0.947887	0.942839	-40.5139	-43.3541
78	0.958918	0.932766	-11.6036	-21.3044
79	0.726462	0.888406	6.12687	-6.64387
80	0.916247	0.849126	-17.3682	-13.9809
81	0.829161	0.80517	7.32145	1.61508
82	0.873502	0.891786	-32.1693	-44.6762
83	0.855305	0.791526	-12.5064	-12.647
84	0.88627	0.825606	-8.27885	-12.6087
85	0.814829	0.751066	-4.81688	-6.69351
86	0.787972	0.775185	11.1294	10.4378
87	0.9282	0.951781	-22.8597	-22.3253
88	0.925774	0.932617	-8.91426	-16.2766
89	0.908484	0.89725	-9.1068	-16.9369
90	0.875633	0.900199	-28.3812	-34.6335
91	0.724592	0.818659	-8.9122	-12.0518
